# Supplementary material
Source: PubMed Central journal article supplement (PMC7934638)
Supplement: mmc1.pdf [file mmc1.pdf]

## **Supplemental Information**

### **CRISPR/Cas9-Mediated Gene Correction in Newborn**

#### **Rabbits with Hereditary Tyrosinemia Type I**

**Nan Li, Shixue Gou, Jiaowei Wang, Qunjun Zhang, Xingyun Huang, Jingke Xie, Li Li, Qin Jin, Zhen Ouyang, Fangbing Chen, Weikai Ge, Hui Shi, Yanhui Liang, Zhenpeng Zhuang, Xiaozhu Zhao, Meng Lian, Yinghua Ye, Longquan Quan, Han Wu, Liangxue Lai, and Kepin Wang**

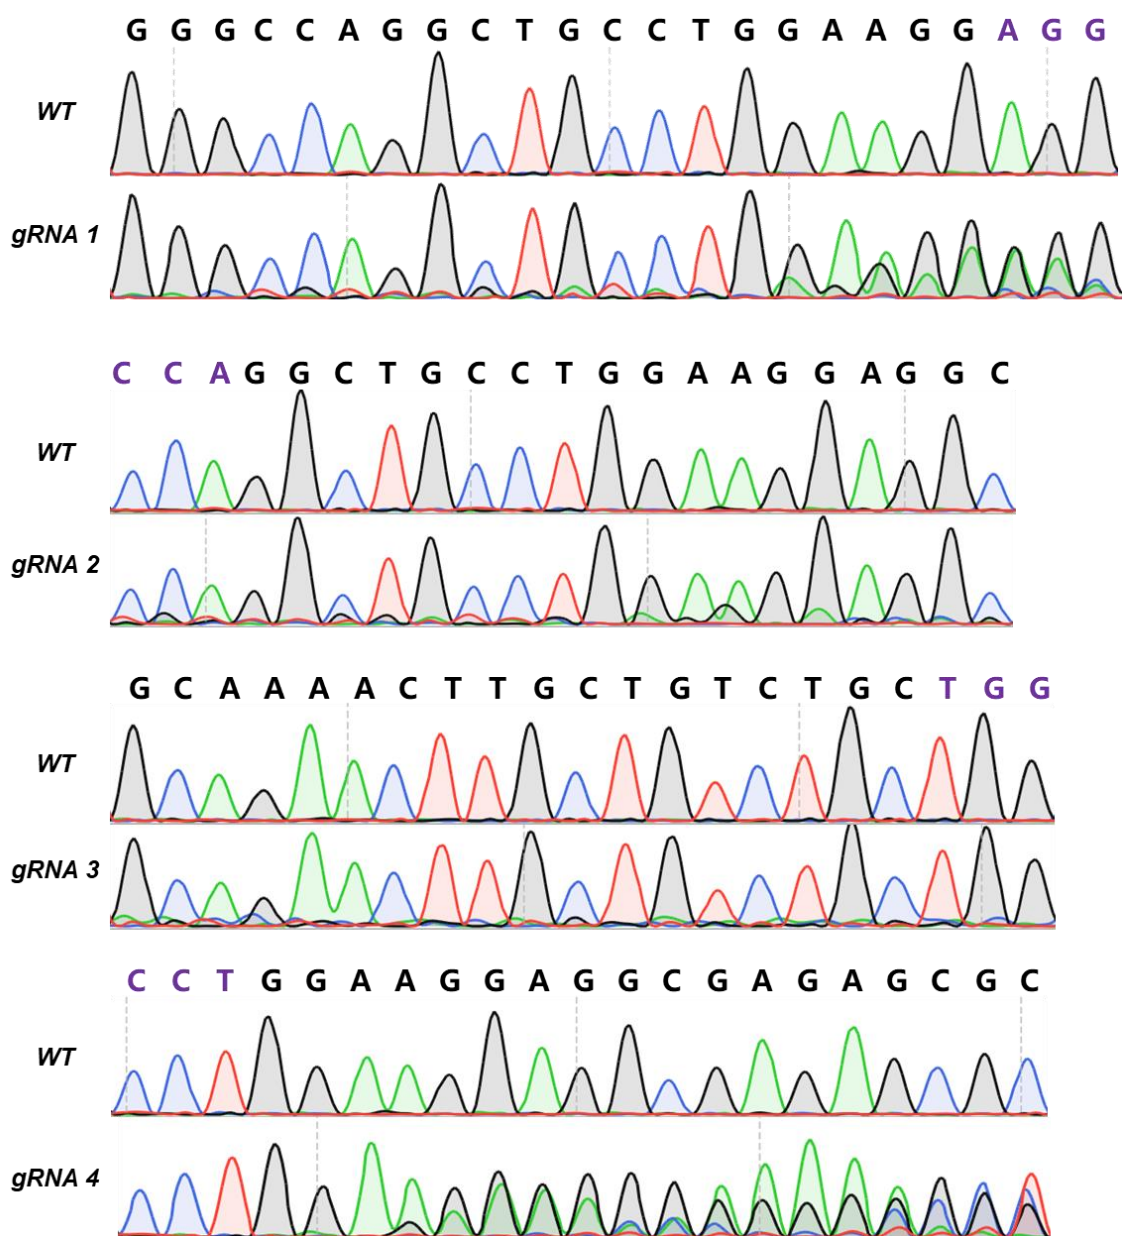

**Figure S1. Sanger sequencing chromatograms of RFFs electroporated with sgRNA1–4 and SpCas9 expressing vectors.**

| <i>Heterozygous<br/>FAH<sup>Δ10/+</sup> male<br/>rabbits</i> | <i>Heterozygous<br/>FAH<sup>Δ10/+</sup> female<br/>rabbits</i> | <i>No. of<br/>offspring</i>    | <i>Genotypes of offspring</i> |                     |                   |
|--------------------------------------------------------------|----------------------------------------------------------------|--------------------------------|-------------------------------|---------------------|-------------------|
|                                                              |                                                                |                                | <i>WT</i>                     | <i>Heterozygote</i> | <i>Homozygote</i> |
| FAH-hetero-Male-1#                                           | FAH-hetero-Female-1#                                           | FAH1-1, 2, 3, 4, 5,<br>6, 7, 8 | FAH1-5, 7, 8                  | FAH1-1, 2, 3, 4     | FAH1-6            |
|                                                              | FAH-hetero-Female-2#                                           | FAH2-1, 2, 3, 4, 5,<br>6, 7    | FAH2-2, 5                     | FAH2-1,4 6, 7       | FAH2-3            |
|                                                              | FAH-hetero-Female-3#                                           | FAH3-1, 2, 3, 4, 5,<br>6, 7, 8 | FAH3-3, 4                     | FAH3-1, 5, 7        | FAH3-2, 6 ,8      |
|                                                              | FAH-hetero-Female-4#                                           | FAH4-1, 2, 3, 4, 5             | FAH4-3, 5                     | FAH4-1, 4           | FAH4-2            |

**Figure S2. Summary of one heterozygous *FAH<sup>Δ10/+</sup>* male rabbit mating with four *FAH<sup>Δ10/+</sup>* female rabbits.**

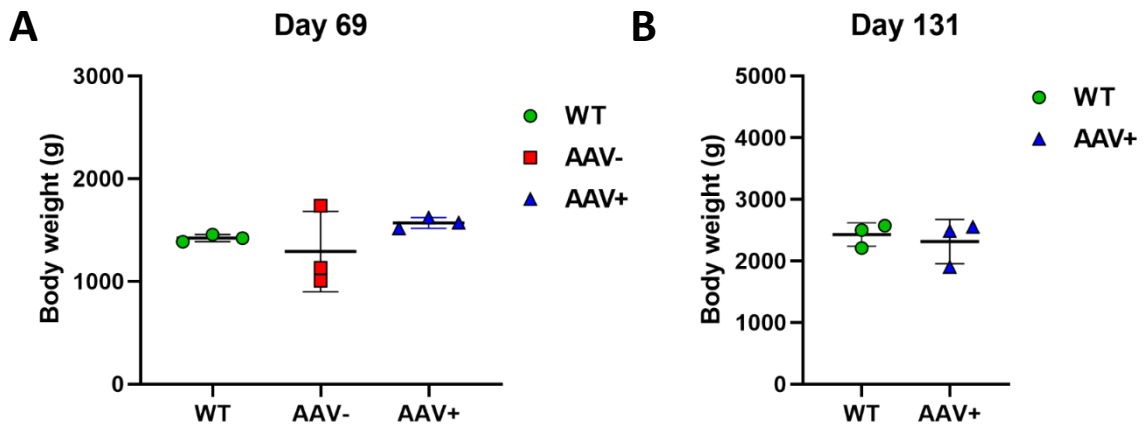

**Figure S3. Body weight analysis.** (A) Body weight of wild-type, HT1 rabbits after injection with AAV or PBS 69 days. (B) Body weight of HT1 rabbits after injection with AAV or PBS 131 days.

**A**

|               | WT    |       |       | AAV-   |         |         | AAV+  |       |       |
|---------------|-------|-------|-------|--------|---------|---------|-------|-------|-------|
|               | WT1   | WT2   | WT3   | FK1    | FK2     | FK3     | FA1   | FA2   | FA3   |
| ALT (IU/L)    | 23.00 | 20.00 | 22.00 | 46.00  | 32.00   | 50.00   | 22.00 | 20.00 | 23.00 |
| AST (IU/L)    | 16.00 | 17.00 | 14.00 | 144.00 | 459.00  | 630.00  | 10.00 | 12.00 | 16.00 |
| SA (μmol/L)   | 0.50  | 0.50  | 0.50  | 10.00  | 5.60    | 6.20    | 0.50  | 0.50  | 0.50  |
| Tyr (μmol/L)  | 83.23 | 57.75 | 75.73 | 85.05  | 2600.54 | 2587.87 | 89.76 | 94.40 | 83.23 |
| TBIL (g/L)    | 1.00  | 0.80  | 0.90  | 30.20  | 1.80    | 2.50    | 1.80  | 1.70  | 1.00  |
| D-BIL (g/L)   | 0.30  | 0.30  | 0.10  | 5.90   | 1.00    | 1.20    | 0.70  | 0.70  | 0.30  |
| BUN (mmol/L)  | 7.83  | 8.16  | 5.17  | 26.11  | 27.70   | 27.52   | 8.23  | 9.83  | 7.83  |
| CREA (μmol/L) | 59.00 | 65.00 | 40.00 | 279.00 | 269.00  | 276.00  | 71.00 | 77.00 | 59.00 |
| TG (μmol/L)   | 1.64  | 0.85  | 1.46  | 14.93  | 1.91    | 1.90    | 3.73  | 2.58  | 1.64  |
| CHOL (mmol/l) | 4.01  | 3.40  | 3.22  | 11.48  | 5.77    | 5.33    | 2.19  | 2.04  | 4.01  |

**B**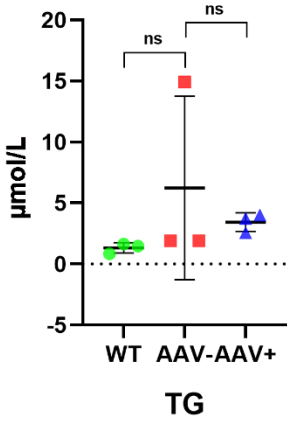**C**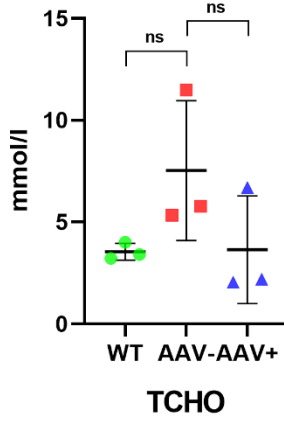**D**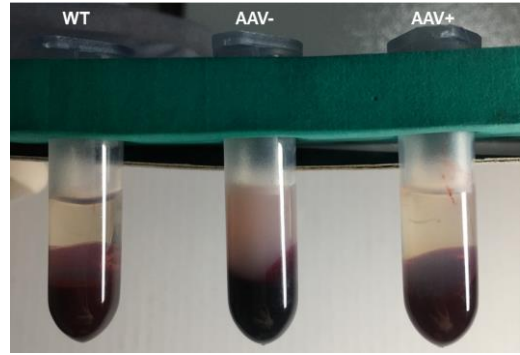**E**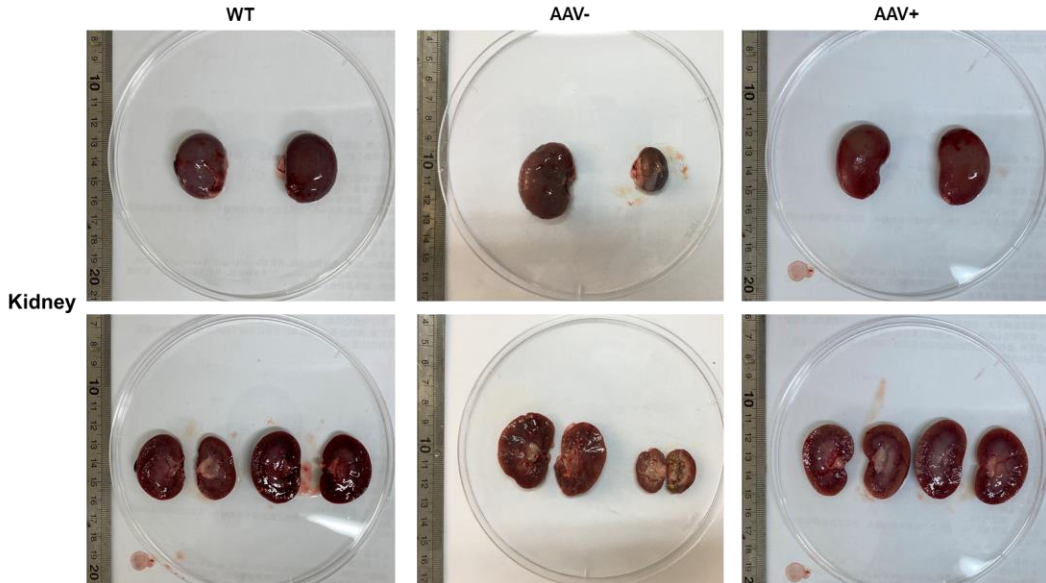

**Figure S4. The efficacy analysis of CRISPR/Cas9-mediated gene therapy of HT1 rabbits.** (A) Detailed information of blood biochemical indexes, including ALT, AST, SA, Tyr, TBIL, D-BIL, BUN, CREA, TG, and CHOL. (B) and (C) TG (B) and CHOL (C) analysis of wild-type, AAV-treated and untreated HT1 rabbits. Error bars, mean  $\pm$  SD. ns, not significant. (D) Picture of blood samples from wild-type, AAV-treated and untreated HT1 rabbits. (E) The intact (top) and dissected (bottom) kidneys of wild-type, AAV-treated and untreated HT1 rabbits.

|         | Target (Copies/100ng DNA) |               | Editing efficiency |
|---------|---------------------------|---------------|--------------------|
|         | A2-Cas9                   | A3-gRNA-donor |                    |
| FA1#-L1 | 1360                      | 3320          | 6.74%              |
| FA1#-L2 | 496                       | 4260          | 9.13%              |
| FA1#-L3 | 976                       | 3130          | 11.80%             |
| FA1#-L4 | 712                       | 7840          | 7.95%              |
| FA1#-L5 | 4320                      | 7040          | 9.17%              |
| FA1#-L6 | 2600                      | 5200          | 8.20%              |
| FA2#-L1 | 2306                      | 5920          | 10.85%             |
| FA2#-L2 | 1292                      | 2316          | 7.42%              |
| FA2#-L3 | 1648                      | 14820         | 8.06%              |
| FA2#-L4 | 3080                      | 7400          | 8.65%              |
| FA2#-L5 | 1408                      | 9240          | 6.47%              |
| FA2#-L6 | 856                       | 11400         | 5.81%              |
| FA3#-L1 | 7580                      | 2212          | 13.92%             |
| FA3#-L2 | 17300                     | 4000          | 12.76%             |
| FA3#-L3 | 7240                      | 13380         | 15.04%             |
| FA3#-L4 | 7460                      | 1852          | 13.41%             |
| FA3#-L5 | 6100                      | 2386          | 10.97%             |
| FA3#-L6 | 15220                     | 5360          | 13.40%             |

**Figure S5. The detailed information of copy numbers of AAV vectors in 100ng whole DNAs extracted from FA1#-L1–L6, FA2#L1–L6, and FA3#L1–L6.**

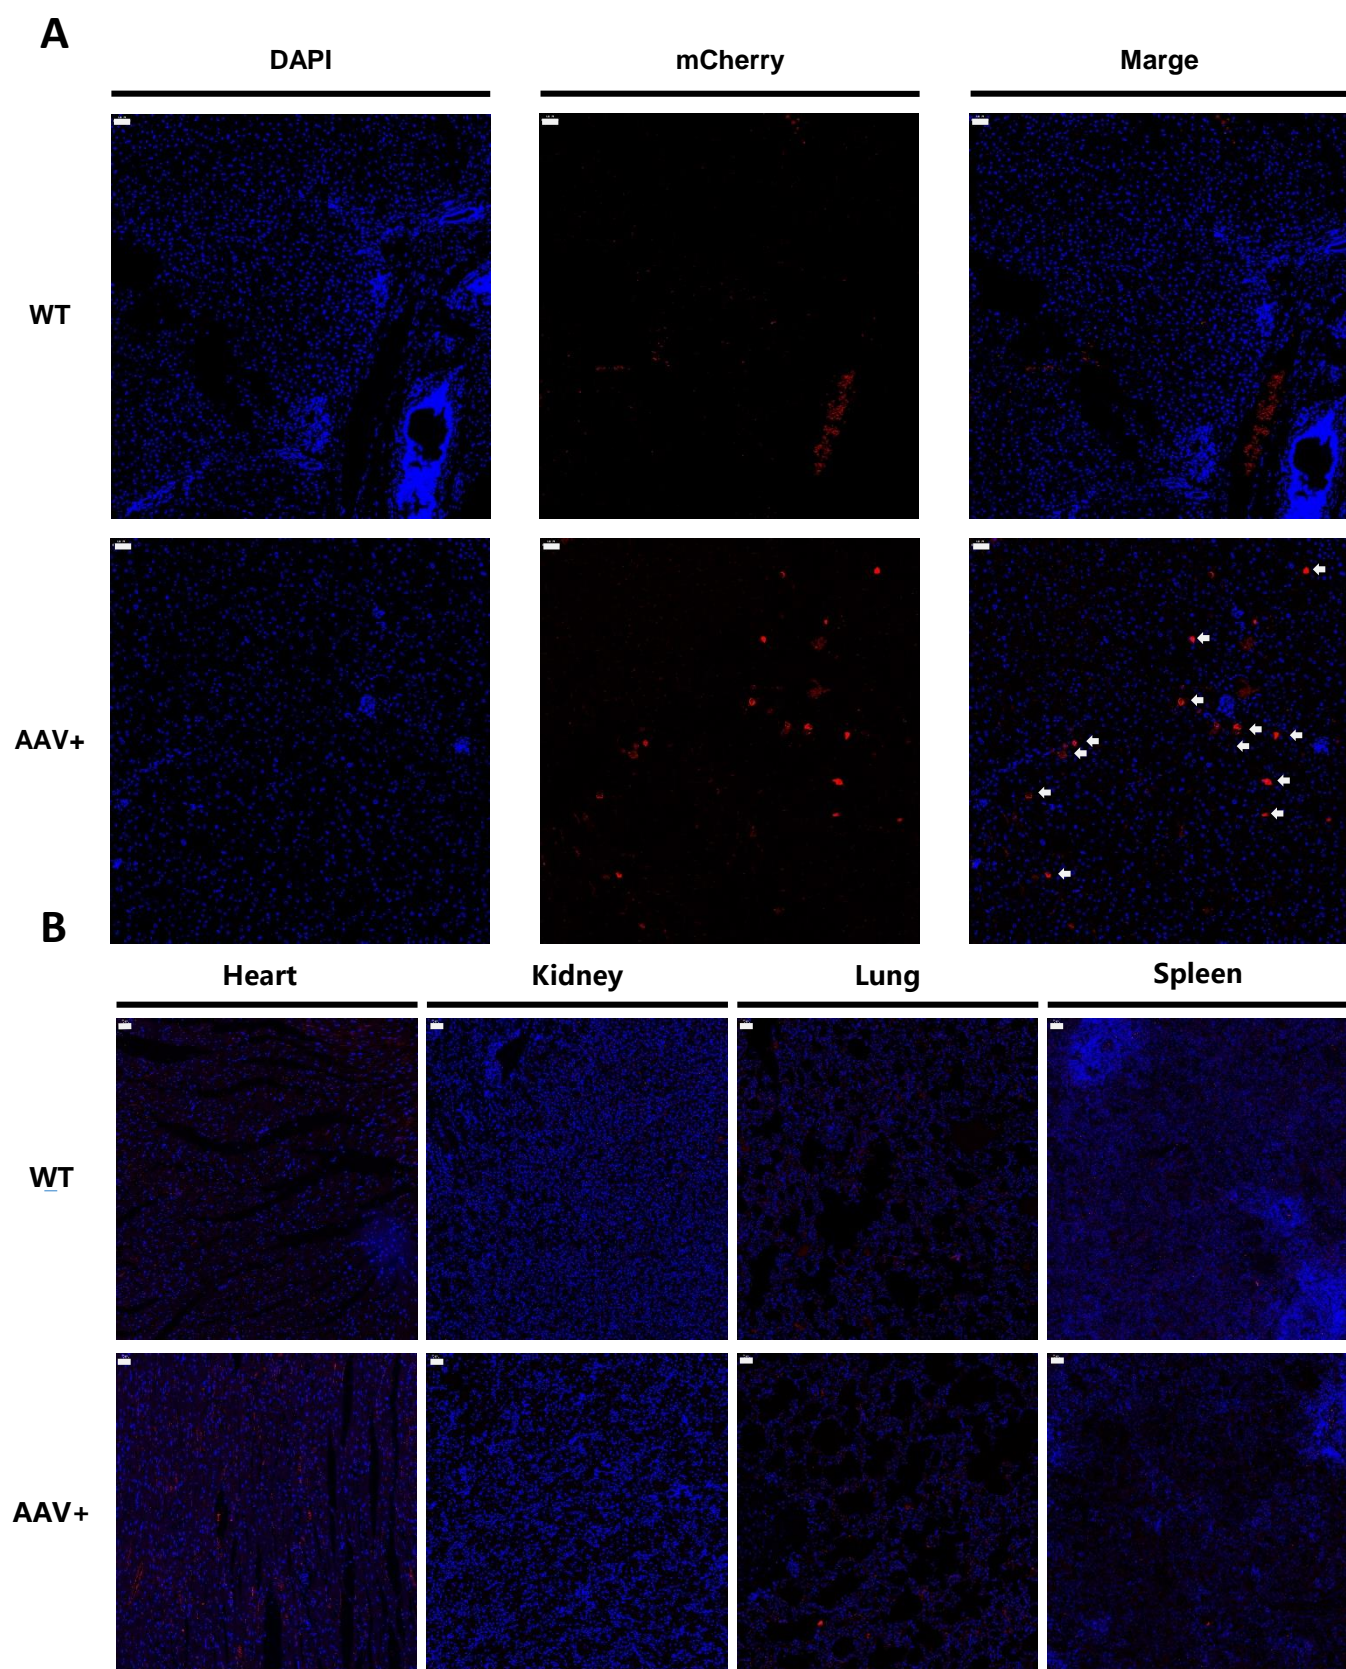

**Figure S6. Fluorescence staining by anti-mCherry antibodies in the liver (A), heart, kidney, lung, and spleen (B) of AAV-treated HT1 rabbits. Scale bar, 50  $\mu$ m.**

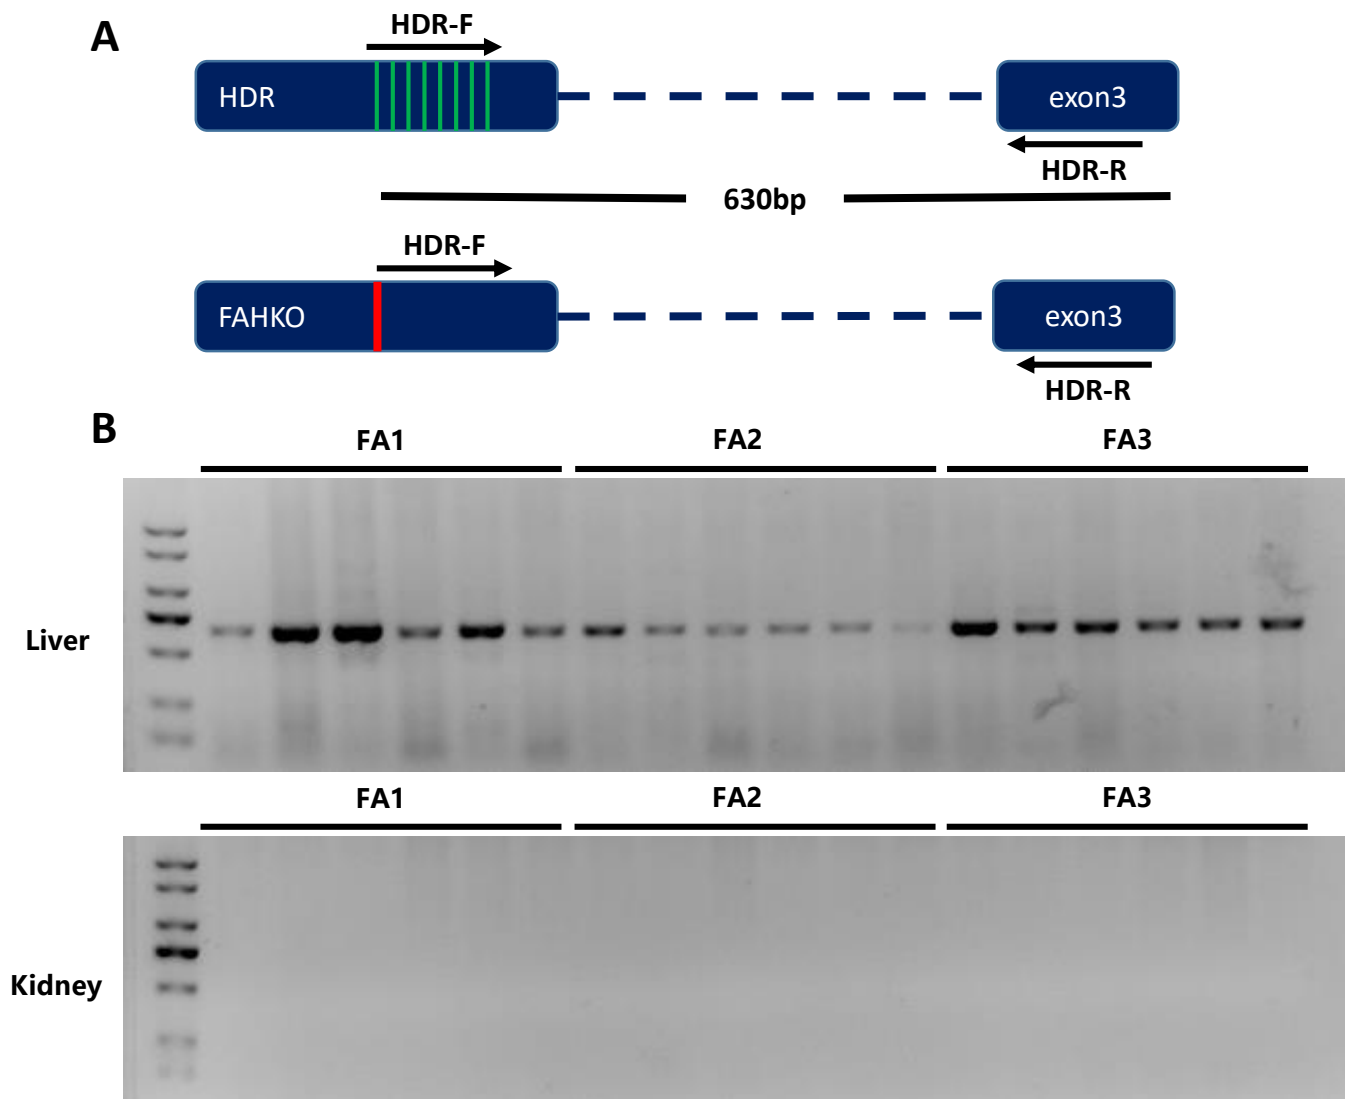

**Figure S7. Schematic views (A) and pictures of agarose gel electrophoresis (B) of the PCR products with specific HDR-F and HDR-R primers in the livers and kidneys of AAV-treated HT1 rabbits.**

A

|         | KO     | SNP (In gRNA) | I3N   | I3N+1 | I3N+2 | D3N   | D3N+1 | D3N+2 | HDR   |
|---------|--------|---------------|-------|-------|-------|-------|-------|-------|-------|
| FA1#-L1 | 93.26% | 0.14%         | 0.08% | 2.28% | 0.14% | 0.36% | 2.16% | 0.29% | 1.29% |
| FA1#-L2 | 90.87% | 0.18%         | 0.07% | 3.98% | 0.16% | 0.33% | 1.66% | 0.41% | 2.34% |
| FA1#-L3 | 88.20% | 0.13%         | 0.06% | 4.83% | 0.21% | 0.52% | 2.31% | 0.68% | 3.07% |
| FA1#-L4 | 92.05% | 0.13%         | 0.05% | 3.20% | 0.16% | 0.32% | 2.04% | 0.37% | 1.68% |
| FA1#-L5 | 90.83% | 0.13%         | 0.07% | 3.82% | 0.13% | 0.33% | 1.56% | 0.41% | 2.71% |
| FA1#-L6 | 91.80% | 0.13%         | 0.07% | 3.46% | 0.17% | 0.30% | 1.55% | 0.43% | 2.09% |
| FA2#-L1 | 89.15% | 0.13%         | 0.03% | 4.40% | 0.28% | 0.31% | 2.46% | 0.57% | 2.67% |
| FA2#-L2 | 92.58% | 0.13%         | 0.00% | 2.81% | 0.23% | 0.37% | 2.15% | 0.13% | 1.59% |
| FA2#-L3 | 91.94% | 0.14%         | 0.06% | 3.16% | 0.09% | 0.30% | 1.77% | 0.47% | 2.08% |
| FA2#-L4 | 91.35% | 0.42%         | 0.14% | 3.41% | 0.01% | 0.41% | 1.72% | 0.56% | 1.98% |
| FA2#-L5 | 93.53% | 0.17%         | 0.05% | 2.38% | 0.07% | 0.30% | 1.61% | 0.46% | 1.43% |
| FA2#-L6 | 94.19% | 0.14%         | 0.01% | 2.02% | 0.16% | 0.49% | 1.70% | 0.37% | 0.90% |
| FA3#-L1 | 86.08% | 1.44%         | 0.08% | 5.26% | 0.18% | 0.51% | 2.65% | 0.47% | 3.33% |
| FA3#-L2 | 87.24% | 1.40%         | 0.08% | 4.54% | 0.27% | 0.58% | 2.91% | 0.68% | 2.30% |
| FA3#-L3 | 84.96% | 1.41%         | 0.11% | 5.72% | 0.24% | 0.53% | 2.69% | 0.63% | 3.71% |
| FA3#-L4 | 86.59% | 2.20%         | 0.07% | 4.20% | 0.15% | 0.60% | 2.57% | 0.75% | 2.87% |
| FA3#-L5 | 89.03% | 1.39%         | 0.08% | 3.92% | 0.22% | 0.52% | 2.13% | 0.46% | 2.26% |
| FA3#-L6 | 86.60% | 1.85%         | 0.06% | 5.01% | 0.15% | 0.58% | 2.02% | 0.46% | 3.28% |

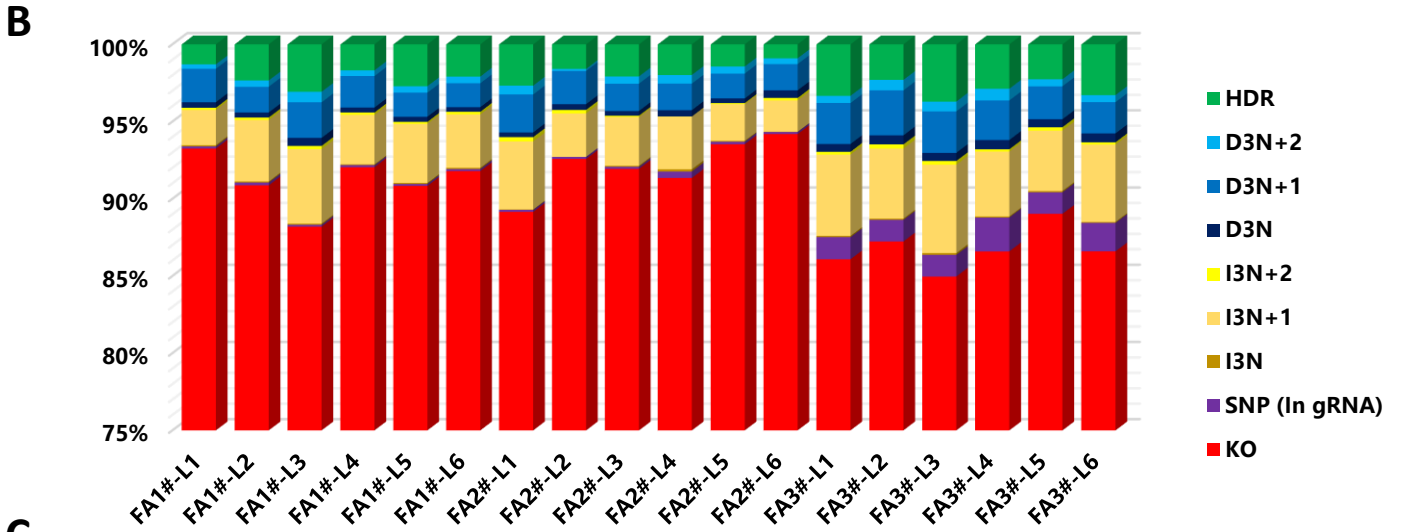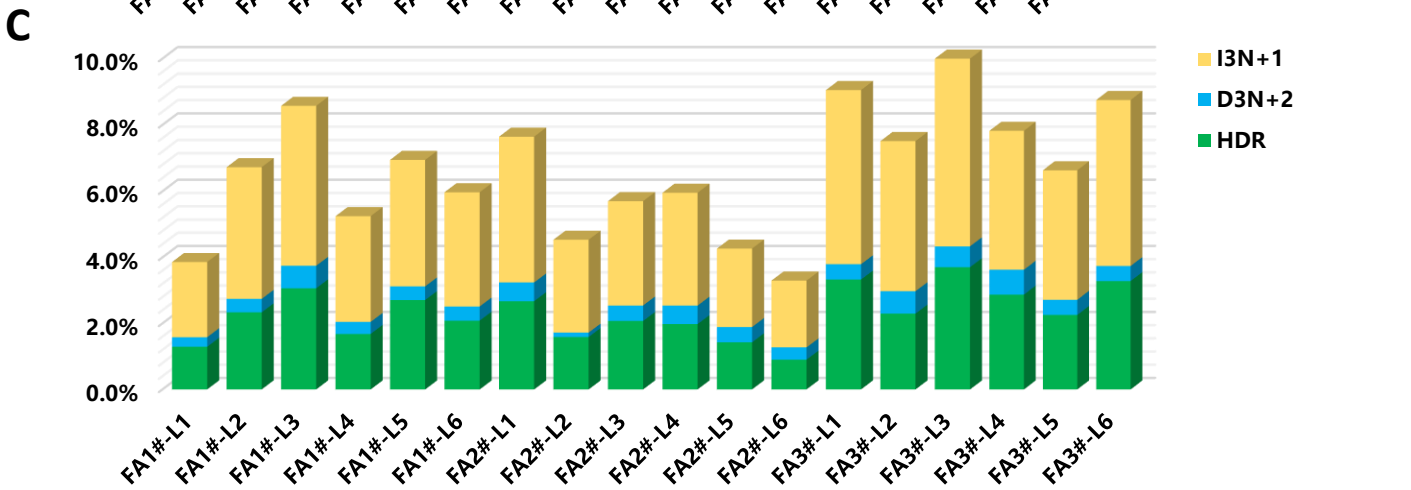

**Figure S8. The results of amplicons deep sequencing of AAV-treated adult HT1 rabbits.** (A) The detailed efficiencies of different mutation patterns of each detected tissues of AAV-treated adult rabbits. (B) Histogram of the deep sequencing results analysis, including 3N+1 bp insertion (I3N+1), 3N+2 bp insertion (I3N+2), 3N bp insertion (I3N), 3N+1 bp deletion (D3N+1), 3N+2 bp deletion (D3N+2), 3N bp deletion (D3N), SNP (In the sgRNA) and HDR. (C) Histogram of efficiencies of HDR-mediated precise gene correction and I3N+1 and D3N+2-mediated out-of-frame to in-frame gene correction in each detected tissues.

**A**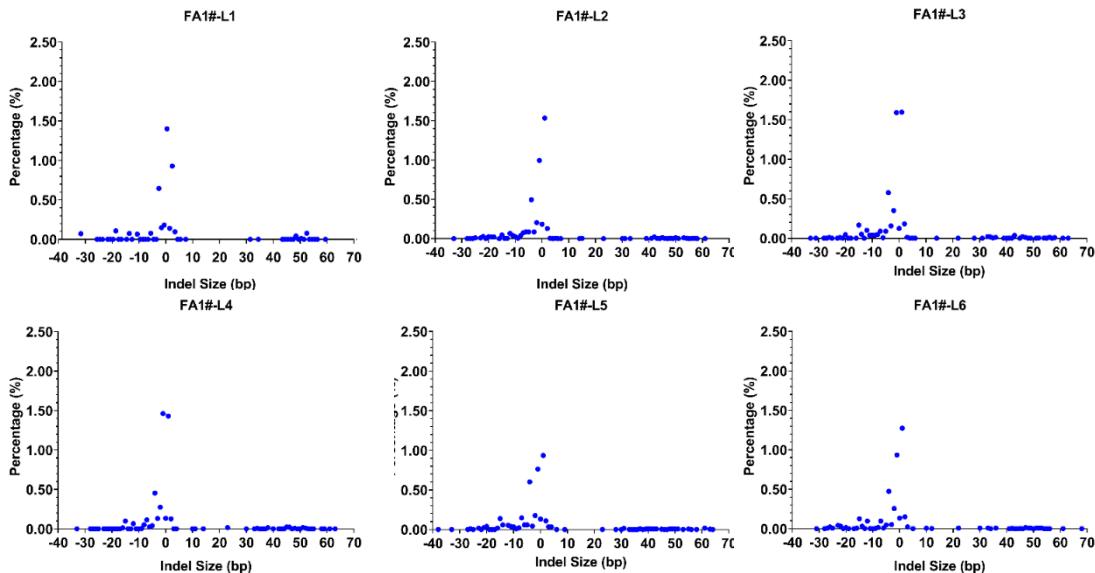**B**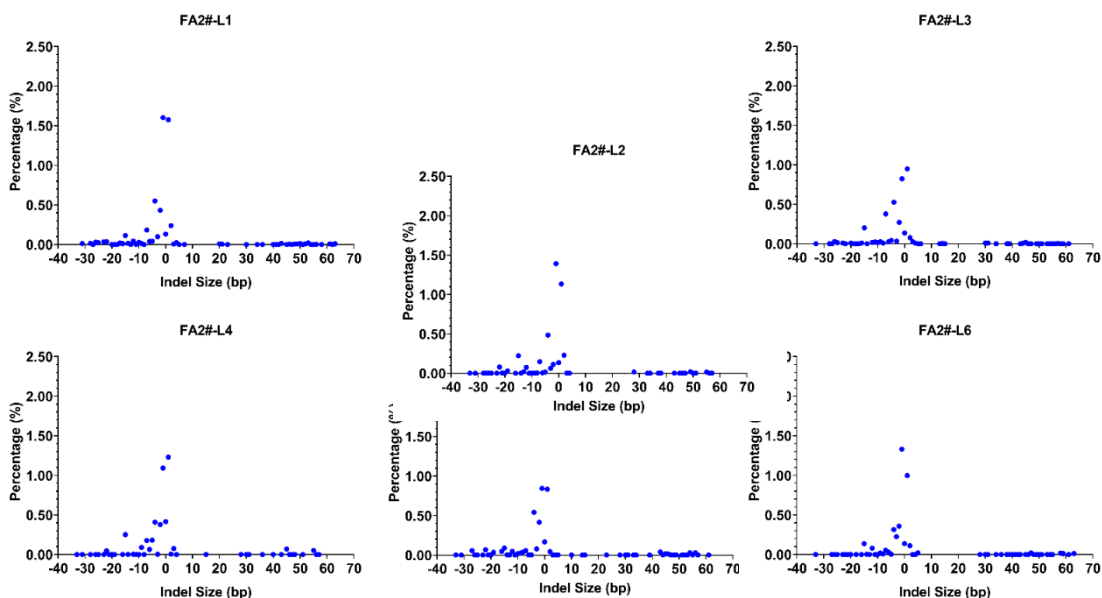**C**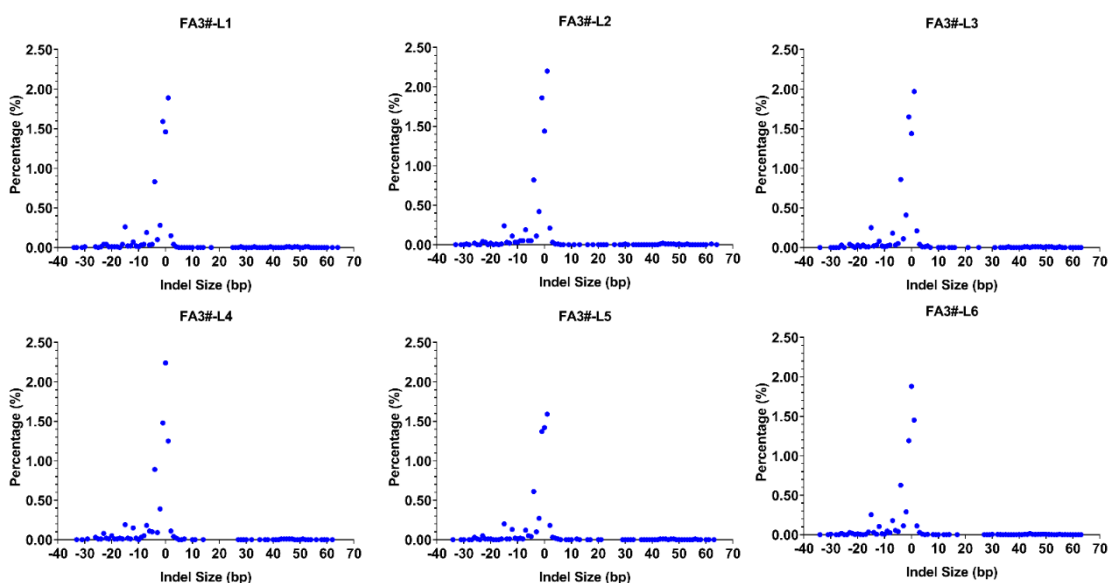

**Figure S9. Diagrams analyzed indels length distribution of FA1#-L1–L6, FA2#L1–L6, and FA3#L1–L6 at sgRNA4 targeting site.**

**A**

|         | KO     | SNP (In gRNA) | I3N   | I3N+1 | I3N+2 | D3N   | D3N+1 | D3N+2 | HDR   |
|---------|--------|---------------|-------|-------|-------|-------|-------|-------|-------|
| FA01-L1 | 88.31% | 1.32%         | 0.11% | 2.35% | 0.39% | 0.49% | 2.71% | 0.66% | 3.67% |
| FA01-L2 | 80.83% | 8.18%         | 0.18% | 3.11% | 0.43% | 0.53% | 4.03% | 1.00% | 1.71% |
| FA01-L3 | 90.78% | 1.24%         | 0.13% | 2.06% | 0.42% | 0.48% | 2.28% | 0.56% | 2.04% |
| FA01-L4 | 88.22% | 1.47%         | 0.17% | 2.25% | 0.57% | 0.41% | 2.90% | 0.71% | 3.32% |
| FA01-L5 | 85.47% | 2.47%         | 0.23% | 2.63% | 0.36% | 0.50% | 3.48% | 0.74% | 4.13% |
| FA01-L6 | 89.52% | 1.71%         | 0.16% | 2.01% | 0.34% | 0.53% | 2.40% | 0.63% | 2.69% |
| FA02-L1 | 88.59% | 1.24%         | 0.18% | 2.51% | 0.43% | 0.46% | 2.81% | 0.81% | 2.97% |
| FA02-L2 | 87.46% | 1.70%         | 0.21% | 2.60% | 0.52% | 0.69% | 3.26% | 0.81% | 2.75% |
| FA02-L3 | 89.20% | 1.36%         | 0.16% | 2.57% | 0.43% | 0.38% | 2.67% | 0.77% | 2.46% |
| FA02-L4 | 87.95% | 3.02%         | 0.16% | 2.47% | 0.41% | 0.34% | 2.96% | 0.72% | 1.97% |
| FA02-L5 | 84.95% | 2.88%         | 0.25% | 3.17% | 0.73% | 0.65% | 3.42% | 1.04% | 2.90% |
| FA02-L6 | 90.02% | 1.49%         | 0.10% | 1.93% | 0.27% | 0.47% | 2.14% | 0.58% | 3.01% |
| FA03-L1 | 81.39% | 2.76%         | 0.15% | 3.18% | 0.49% | 0.98% | 4.26% | 1.35% | 5.44% |
| FA03-L2 | 82.90% | 1.75%         | 0.22% | 3.72% | 0.61% | 0.74% | 4.30% | 1.20% | 4.57% |
| FA03-L3 | 85.96% | 1.46%         | 0.32% | 3.22% | 0.64% | 0.69% | 3.52% | 0.94% | 3.24% |
| FA03-L4 | 82.72% | 1.36%         | 0.18% | 3.50% | 0.54% | 0.71% | 4.11% | 1.07% | 5.83% |
| FA03-L5 | 81.07% | 6.64%         | 0.14% | 3.24% | 0.43% | 0.69% | 4.07% | 1.10% | 2.64% |
| FA03-L6 | 86.15% | 1.88%         | 0.15% | 2.81% | 0.46% | 0.52% | 3.33% | 1.06% | 3.63% |

**B**

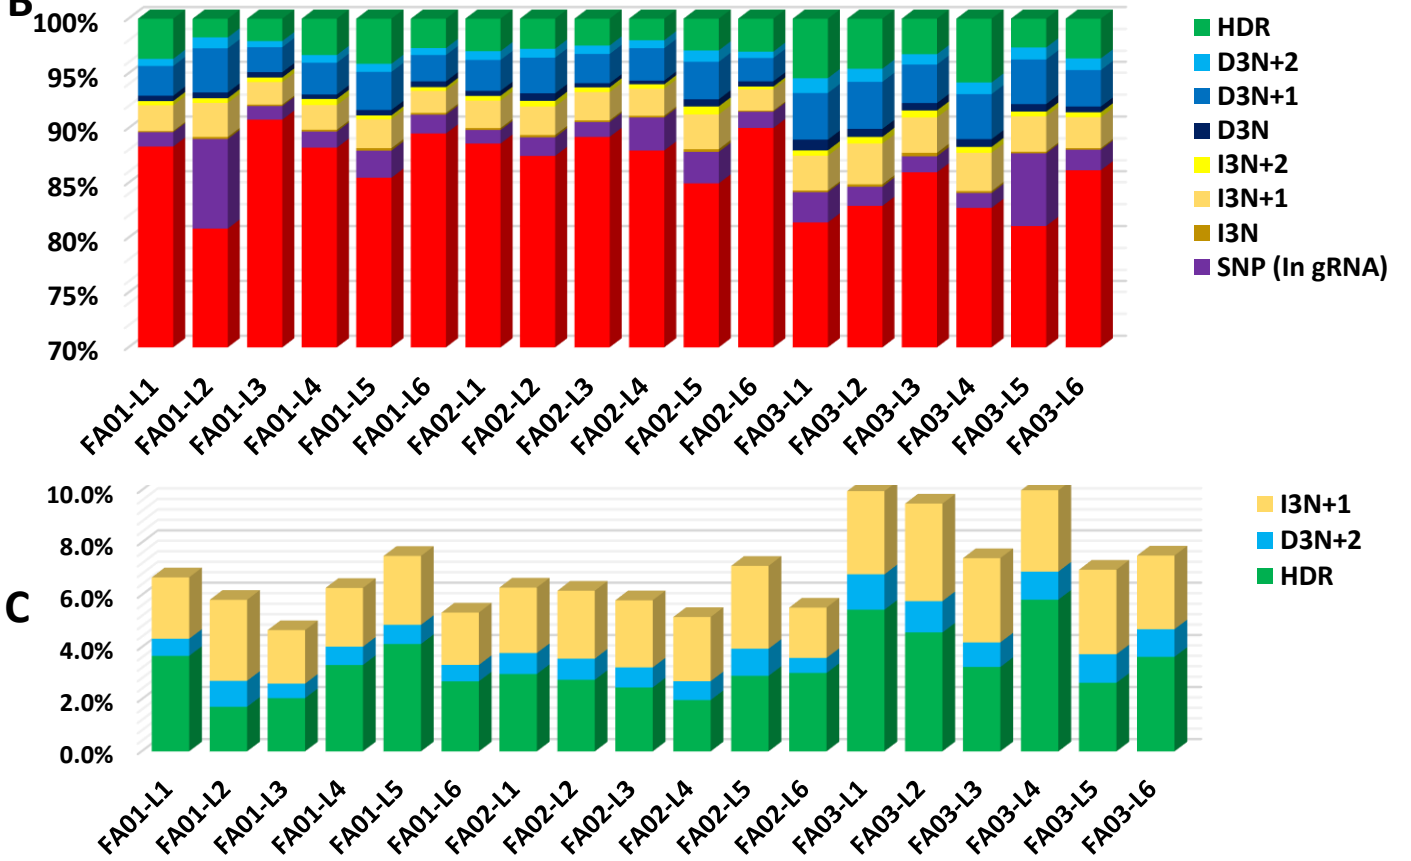

**Figure S10. The results of amplicons deep sequencing of newborn HT1 rabbits with one week AAV treatment.** (A) The detailed initial efficiencies of different mutation patterns of each detected tissues of newborn HT1 rabbits with one week AAV treatment. (B) Histogram of initial efficiencies by analysis of the deep sequencing data. (C) Histogram of initial efficiencies of HDR-mediated precise gene correction and I3N+1 and D3N+2-mediated out-of-frame to in-frame gene correction.

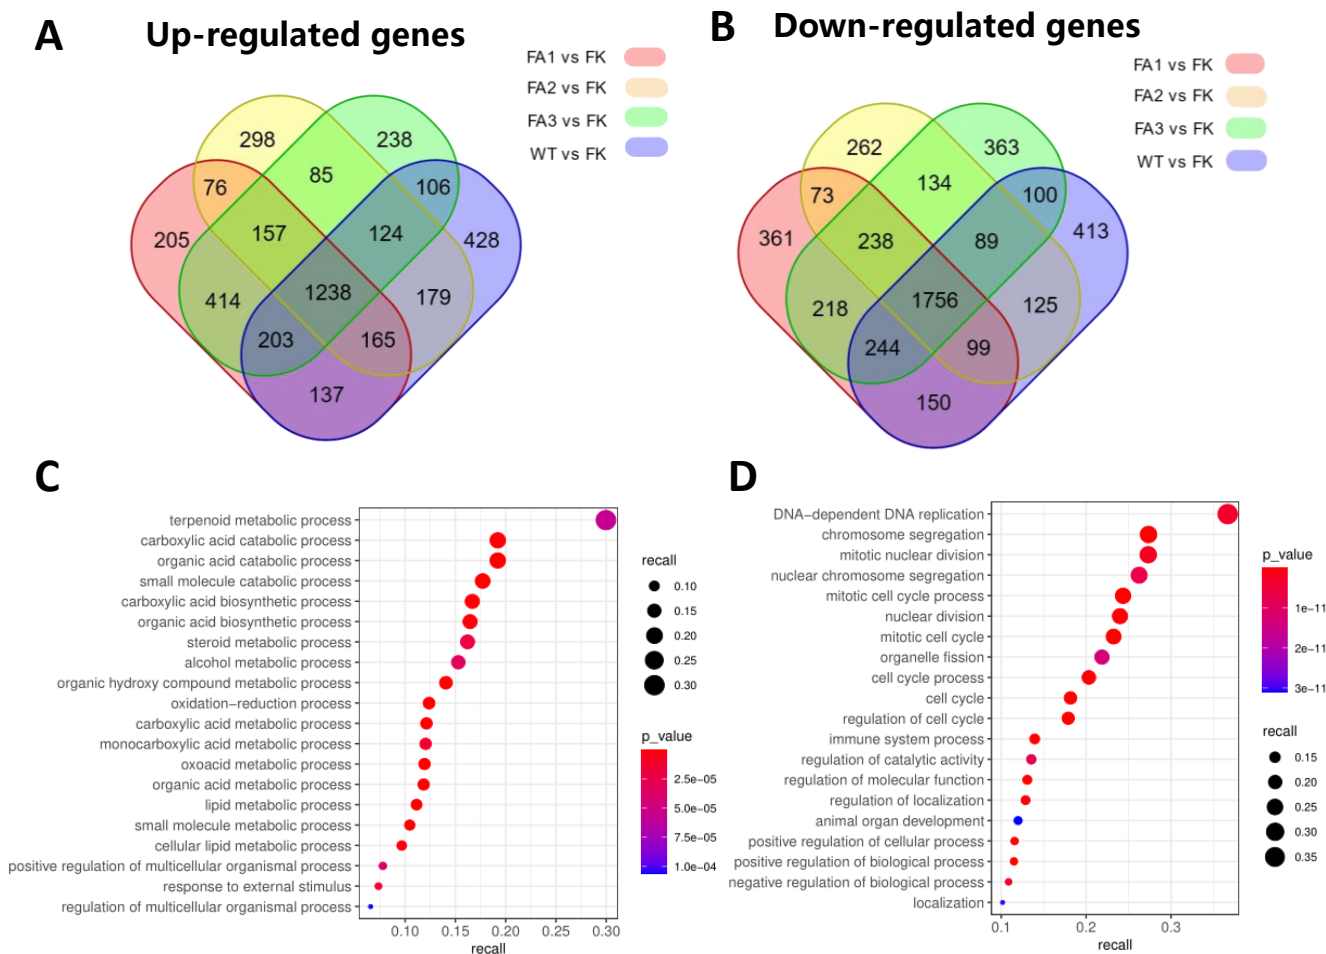

**Figure S11. Analysis of up-regulated and down-regulated genes.** (A) and (B) The number genes of up-regulated (A) and down-regulated (B) in the wild-type and AAV-treated (FA1, FA2, and FA3) rabbits (Venn diagram). The overlap corresponds to the genes commonly upregulated or downregulated in the wild-type and AAV-treated rabbits. (C) and (D) Gene ontology (GO) analysis of commonly up-regulated (C) and down-regulated (D) differentially genes in wild-type ( $n=3$ ) and AAV-treated ( $n=3$ ) rabbits vs PBS-treated ( $n=3$ ) HT1 rabbits.

| Primer      | 5'-3'                                           |
|-------------|-------------------------------------------------|
| FAH-gRNA1-F | CACCGGGCCAGGCTGCCTGGAAGG                        |
| FAH-gRNA1-R | AAACCCCTTCCAGGCAGCCTGGCCC                       |
| FAH-gRNA2-F | CACCGCCTCCTTCCAGGCAGCC                          |
| FAH-gRNA2-R | AAACGGCTGCCTGGAAGGAGGC                          |
| FAH-gRNA3-F | CACCGCAAAACTTGCTGTCTGC                          |
| FAH-gRNA3-R | AAACGCAGACAGCAAGTTTTC                           |
| FAH-gRNA4-F | CACCGCGCTCTCGCCTCCTTCC                          |
| FAH-gRNA4-R | AAACGGAAGGAGGCGAGAGCGC                          |
| FAH-HDR-F1  | GGGGACCCCTCTAGCATAGGA                           |
| FAH-HDR-R1  | CGCGTCTTTCCACGCTGCTTGCCCGAGGCCCATGAAGCTGTTGAGAG |
| FAH-HDR-F2  | CCTCGGGCAAGCAGCGTGGAAGACGCGAGAGCGCTGCTGCAAACT   |
| FAH-HDR-R2  | GCAGGATCCATGCAGACCATC                           |
| FAH-F       | CAGGTCTCAGGTTACAGAGC                            |
| FAH-R       | AGGTGCATCGTGGAACAGC                             |
| HDR-F       | CGGGCAAGCAGCGTGGAAG                             |
| HDR-R       | TCGTGGCAACAGCCTGAGAG                            |
| OT1-F       | GCACCTGCACCTCTAATGCT                            |
| OT1-R       | GGCCAGGCCTTAAGAGTCTG                            |
| OT2-F       | ATGCAACCAATGTGCAAACA                            |
| OT2-R       | CACTTCTGTGTCGCCTGTGA                            |
| OT3-F       | GAGGGAAGGAGAAAGGCTCG                            |
| OT3-R       | GCTCGGTACTCCACGCTC                              |
| OT4-F       | AGTTCTCACTCGCATGCACA                            |
| OT4-R       | AGCCGTTTAAGGAGCTGCTT                            |
| OT5-F       | CAAGGCCTCTCACTGGACTG                            |
| OT5-R       | ATAGACCCTTCACGCCTCCT                            |
| OT6-F       | TCTCCATCCGTCCGGTAGAG                            |
| OT6-R       | GCTTTAGGTTTGCCTTGGCC                            |
| OT7-F       | GGTTTCGTAGTCGCACGGTA                            |
| OT7-R       | CAGGACCCTGCTCAGCTTC                             |
| OT8-F       | CTGCGAGTGTAAGACGGAGG                            |
| OT8-R       | TGGATTGGATATGGAGCCGC                            |
| OT9-F       | GAAAGGGAGGGAGACAGGGA                            |
| OT9-R       | TGTAGTGCAGCAGGTTAGGC                            |
| OT10-F      | CAGAGCCTGCCTGGGATTAG                            |

**Table S1. Primers used in this study**
